RESEARCH ARTICLE

# Optimizing the impact of time domain segmentation techniques on upper limb EMG decoding using multimodal features

Muhammad Faisal<sup>1</sup>, Ikramullah Khosa<sup>1</sup>, Asim Waris<sup>2\*</sup>, Syed Omer Gilani<sup>3</sup>, Muhammad Jawad Khan<sup>4</sup>, Fawwaz Hazzazi<sup>4</sup>, Muhammad Adeel Ijaz<sup>5</sup>

**1** Department of Electrical and Computer Engineering, COMSATS University Islamabad, Lahore Campus, Lahore, Pakistan, **2** Department of Biomedical Engineering & Sciences, National University of Sciences and Technology, Islamabad, Pakistan, **3** Department of Computer and Electrical Engineering, Abu Dhabi University, Abu Dhabi, United Arab Emirates, **4** Department of Electrical Engineering, School of Engineering, Prince Sattam Bin Abdulaziz University, Al-Kharj, Saudi Arabia, **5** Department of Biomedical Engineering & Sciences, National University of Sciences and Technology, Islamabad, Pakistan

\* [asim.waris@smme.nust.edu.pk](mailto:asim.waris@smme.nust.edu.pk)

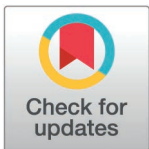

## Abstract

Neurological disorders, such as stroke, spinal cord injury, and amyotrophic lateral sclerosis, result in significant motor function impairments, affecting millions of individuals worldwide. To address the need for innovative and effective interventions, this study investigates the efficacy of electromyography (EMG) decoding in improving motor function outcomes. While existing literature has extensively explored classifier selection and feature set optimization, the choice of preprocessing technique, particularly time-domain windowing techniques, remains understudied posing a significant knowledge gap. This study presents upper limb movement classification by providing a comprehensive comparison of eight time-domain windowing techniques. For this purpose, the EMG data from volunteers is recorded involving fifteen distinct movements of fingers. The rectangular window technique among others emerged as the most effective, achieving a classification accuracy of 99.98% while employing 40 time-domain features and a L-SVM classifier, among other classifiers. This optimal combination has implications for the development of more accurate and reliable myoelectric control systems. The achieved high classification accuracy demonstrates the feasibility of using surface EMG signals for accurate upper limb movement classification. The study's results have the potential to improve the accuracy and reliability of prosthetic limbs and wearable sensors and inform the development of personalized rehabilitation programs. The findings can contribute to the advancement of human-computer interaction and brain-computer interface technologies.

## OPEN ACCESS

**Citation:** Faisal M, Khosa I, Waris A, Gilani SO, Khan MJ, Hazzazi F, et al. (2025) Optimizing the impact of time domain segmentation techniques on upper limb EMG decoding using multimodal features. PLoS One 20(5): e0322580. <https://doi.org/10.1371/journal.pone.0322580>

**Editor:** Noman Naseer, Air University, PAKISTAN

**Received:** January 20, 2025

**Accepted:** March 24, 2025

**Published:** May 8, 2025

**Peer Review History:** PLOS recognizes the benefits of transparency in the peer review process; therefore, we enable the publication of all of the content of peer review and author responses alongside final, published articles. The editorial history of this article is available here: <https://doi.org/10.1371/journal.pone.0322580>

**Copyright:** © 2025 Faisal et al. This is an open access article distributed under the terms of the [Creative Commons Attribution License](https://creativecommons.org/licenses/by/4.0/), which permits unrestricted use, distribution,

and reproduction in any medium, provided the original author and source are credited.

**Data availability statement:** Data is now uploaded on IEEE DataPort Below is the link: <https://iee-dataport.org/documents/upper-limb-emg>.

**Funding:** This work was supported by the Abu Dhabi University ORSP grant (No. 19300909).

**Competing interests:** No authors have competing interests.

## I. Introduction

Upper limb movement recognition is a crucial aspect of several applications, including healthcare, rehabilitation, prosthetics, and human-computer interaction [1–7].

Neurological disorders, such as stroke, spinal cord injury, and amyotrophic lateral sclerosis, affect millions of individuals worldwide, resulting in significant motor function impairments and decreased quality of life. Despite advances in rehabilitation strategies, many individuals with neurological disorders experience persistent motor function deficits, highlighting the need for innovative and effective interventions. The development of novel rehabilitation strategies, such as electromyography (EMG) decoding, has shown promise in improving motor function outcomes in individuals with neurological disorders. EMG decoding involves the use of surface electromyography to decode muscle activity and provide real-time feedback to individuals with motor function impairments. This technology has the potential to promote motor learning and neuroplasticity, leading to improved motor function outcomes.

Electro-myography (EMG) data analysis plays a vital role in understanding the electrical activity of muscles, which is essential for diagnosing and treating neuromuscular disorders. The accurate decoding of electromyography (EMG) signals is crucial for the development of intuitive human-machine interfaces, particularly in the field of prosthetics and rehabilitation. Despite significant advances in EMG decoding, existing studies have been limited by their reliance on simplistic signal processing techniques. This study aims to propose a novel EMG decoding framework that leverages advanced signal processing techniques.

EMG data analysis is important because it provides valuable insights into muscle function, allowing clinicians to assess muscle damage, monitor disease progression, and evaluate the effectiveness of treatments. The applications of EMG data analysis are diverse and widespread. In medical rehabilitation, EMG data analysis is used to develop personalized rehabilitation programs for patients with stroke, spinal cord injuries, and other neurological disorders [8–11]. In sports, EMG data analysis is used to optimize athletic performance, prevent injuries, and develop more effective training programs [12]. Additionally, EMG data analysis has been used to diagnose and monitor several diseases, including muscular dystrophy, amyotrophic lateral sclerosis (ALS), and Parkinson's disease [13–17].

In this context, Recent research has demonstrated that the Kernel Extreme Learning Machine (KELM) algorithm, optimized by the Sparrow Search Algorithm (SSA), achieves better recognition accuracy and speed in each segment. Recognition accuracy reached 98.4% in 1/8 sEMG segments [18]. Findings from a recent investigation compared classification algorithms using surface and intramuscular EMG signals for myoelectric control of upper limb prosthesis, showing near-perfect performance within days and robustness over time with deep architecture classifiers [19]. Similarly, Researchers evaluated 29 time and 4 frequency domain features using techniques like exhaustive and sequential forward selection, achieving accuracy of 92.17% using the K nearest neighbor classifier [20]. A recent investigation aimed to decode nine hand and forearm motion classes from forearm EMG in 15 stroke patients, achieving an intraclass correlation coefficient of 0.88 and average

accuracy of  $79 \pm 12\%$  [21]. The use of EMG raw signals as inputs for deep networks has been explored, achieving mean accuracies of  $97.60 \pm 1.99$  and  $98.12 \pm 1.07$  using convolutional neural networks and SSAE-f methods [22]. Utilizing surface electromyography (EMG) to non-invasively infer movement intention presents a promising approach for controlling upper extremity technologies [23]. The study proposes a surface electromyography technique for enhancing upper limb motion intentions precision by analyzing intrinsic and residual functions using empirical mode decomposition and least squares support vector machine [24]. Feedback training allows amputees to acquire specific muscle activation patterns, which can greatly improve myoelectric prosthesis control effectiveness [25]. A two-layered feature selector is employed to identify the most valuable features, optimizing the selection process. In the classification phase, two fine-tuned classifiers, KNN and SVM, are utilized to enhance performance [26].

Achieving high accuracy in upper limb movement classification is crucial for developing reliable and effective prosthetic devices, as well as for improving the quality of life for individuals with upper limb amputations. To address this critical need, the present study provides a comprehensive evaluation of the impact of time-domain windowing techniques, feature extraction methods, and classification algorithms on upper limb movement classification accuracy. Specifically, this study aims to identify the optimal combination of techniques for achieving high accuracy, thereby informing the development of more intuitive and effective prosthetic limbs, rehabilitation systems, and human-computer interaction technologies.

## II. Methods

### A. Participants

Fifteen healthy volunteers (6 female, 9 male), aged 19–27 years, were recruited from SMME, NUST Islamabad. Written informed consent was obtained from all participants. Data were collected from human participants on 25 April, 10 May, and 11 June 2024, to capture seasonal variations and longitudinal changes in the study population over a three-month period, thereby providing a dynamic dataset for comparing the performance of 8 time-domain windowing techniques.

The data collection procedure for this study received ethics approval from the National University of Sciences and Technology (NUST) Ethics Committee in Islamabad, Pakistan, with an approval number of NUST/SMM-BME/REC/000471/104362024. Participants were included if they were in good health, with no history of illnesses or physical/mental health problems. The experimental protocol involved individual and combined finger movements. Each participant performed 6-second movements, followed by 4 seconds of rest. This movement-rest cycle was repeated 5 times for each participant. A comprehensive list of demographic profile of the 15 subjects who participated in EMG data collection is presented in Table 1. To ensure data quality and integrity, we employed several procedures. Firstly, all data were collected using standardized instruments, which were calibrated regularly to ensure accuracy. Secondly, data were entered into a secure database, which was regularly backed up to prevent data loss. Data can be assessed through <https://iee-data-port.org/documents/upper-limb-emg>. Finally, data were cleaned prior to analysis. We also acknowledge potential biases and limitations inherent to the data collection method.

### B. Recordings surface EMG

The experimental setup employed a computer-based system to record electromyography (EMG) signals from 15 distinct finger movements, utilizing the Delsys Trigno EMG system. This system features wireless, wearable EMG sensors that incorporate a proprietary, parallel-bar electrode configuration, enabling the detection of muscle activity with high spatial resolution. Each sensor is equipped with a 16-bit analog-to-digital converter, facilitating the sampling of EMG signals at a rate of up to 2000 Hz and signals were amplified using the built-in amplifier (gain: 927). The sensors transmit the EMG data to the computer in real-time via a wireless radio frequency (RF) link, establishing communication with the Trigno base station. Notably, the Trigno Avanti system offers selectable EMG bandwidth settings, on-board signal processing, and seamlessly integrates high-quality EMG signals with inertial measurement unit (IMU) data, providing a comprehensive analysis of movement patterns. Characterized by its compact and durable design, the Trigno Avanti sensor is well-suited

**Table 1. Demographic profile of the 15 subjects who participated in EMG data collection.**

| Participant ID | Sex    | Age (years) | Hand Dominance | Sensor placement | Self-reported health status |
|----------------|--------|-------------|----------------|------------------|-----------------------------|
| 1.             | Female | 24          | Right          | Left Arm         | Normal                      |
| 2.             | Male   | 26          | Right          | Left Arm         | Normal                      |
| 3.             | Male   | 21          | Left           | Left Arm         | Normal                      |
| 4.             | Female | 24          | Right          | Left Arm         | Normal                      |
| 5.             | Male   | 24          | Left           | Left Arm         | Normal                      |
| 6.             | Male   | 24          | Right          | Left Arm         | Normal                      |
| 7.             | Female | 24          | Right          | Left Arm         | Normal                      |
| 8.             | Male   | 22          | Right          | Left Arm         | Normal                      |
| 9.             | Male   | 25          | Right          | Left Arm         | Normal                      |
| 10.            | Female | 23          | Right          | Left Arm         | Normal                      |
| 11.            | Male   | 24          | Left           | Left Arm         | Normal                      |
| 12.            | Female | 27          | Right          | Left Arm         | Normal                      |
| 13.            | Male   | 20          | Right          | Left Arm         | Normal                      |
| 14.            | Female | 23          | Right          | Left Arm         | Normal                      |
| 15.            | Male   | 19          | Left           | Left Arm         | Normal                      |

<https://doi.org/10.1371/journal.pone.0322580.t001>

for a variety of applications, including movement sciences, physical therapy, and sports science. Fig 1 illustrates the block diagram outlining the steps involved in EMG data recording to classification.

In this study, three Trigno Avanti wireless Bluetooth surface EMG sensors were placed on the forearm over the Flexor Carpi Radialis, Flexor Carpi Ulnaris, and Brachioradialis muscles, as these muscles are responsible for wrist and finger movements. These are spaced 2.5 cm apart to minimize cross-talk and ensure accurate signal acquisition. Sensors were carefully placed on the participants' left hand, secured using adhesive strips to ensure optimal contact with the skin, and subsequently recorded EMG signals from the finger movements with high fidelity.

During data collection, each participant performed a series of finger movements while seated in a comfortable position, following a predefined protocol. Each movement was repeated five times. The EMG signals were recorded using Trigno Avanti wireless Bluetooth surface EMG sensors, connected to a computer running the Trigno software. The data collection software allowed configuration of the sampling frequency, gain, and other settings as required. To ensure data quality, we visually inspected the EMG signals in real-time during data collection and verified that they were free from artifacts and noise.

Participants were recruited through flyers posted in local universities. Interested participants were asked to complete a brief screener survey to assess their eligibility for the study. The survey included questions about their age, health status, and previous experience with EMG data collection. Participants who met the eligibility criteria were then contacted to schedule a data collection session.

### C. Experimental setup

The Trigno Avanti wireless Bluetooth system (Delsys, Inc., Natick, MA, USA) was set up according to the manufacturer's guidelines. Prior to data collection, the sensors were fully charged, and the skin was prepared on the left forearm over the Flexor Carpi Radialis, Flexor Carpi Ulnaris, and Brachioradialis muscles, adhering to the recommended placement protocols. The sensors were secured using straps or adhesive, and the Trigno Avanti software was downloaded and installed on a computer. The sensors were paired with the software, and the sampling frequency, gain, and other settings were configured as required. Data acquisition was initiated, and the signal quality was verified to ensure optimal recording parameters. A single recording session was conducted for each participant, with the data collected over three days. Specifically, recordings from a subset of participants were obtained on each day, resulting in a total of three days of data

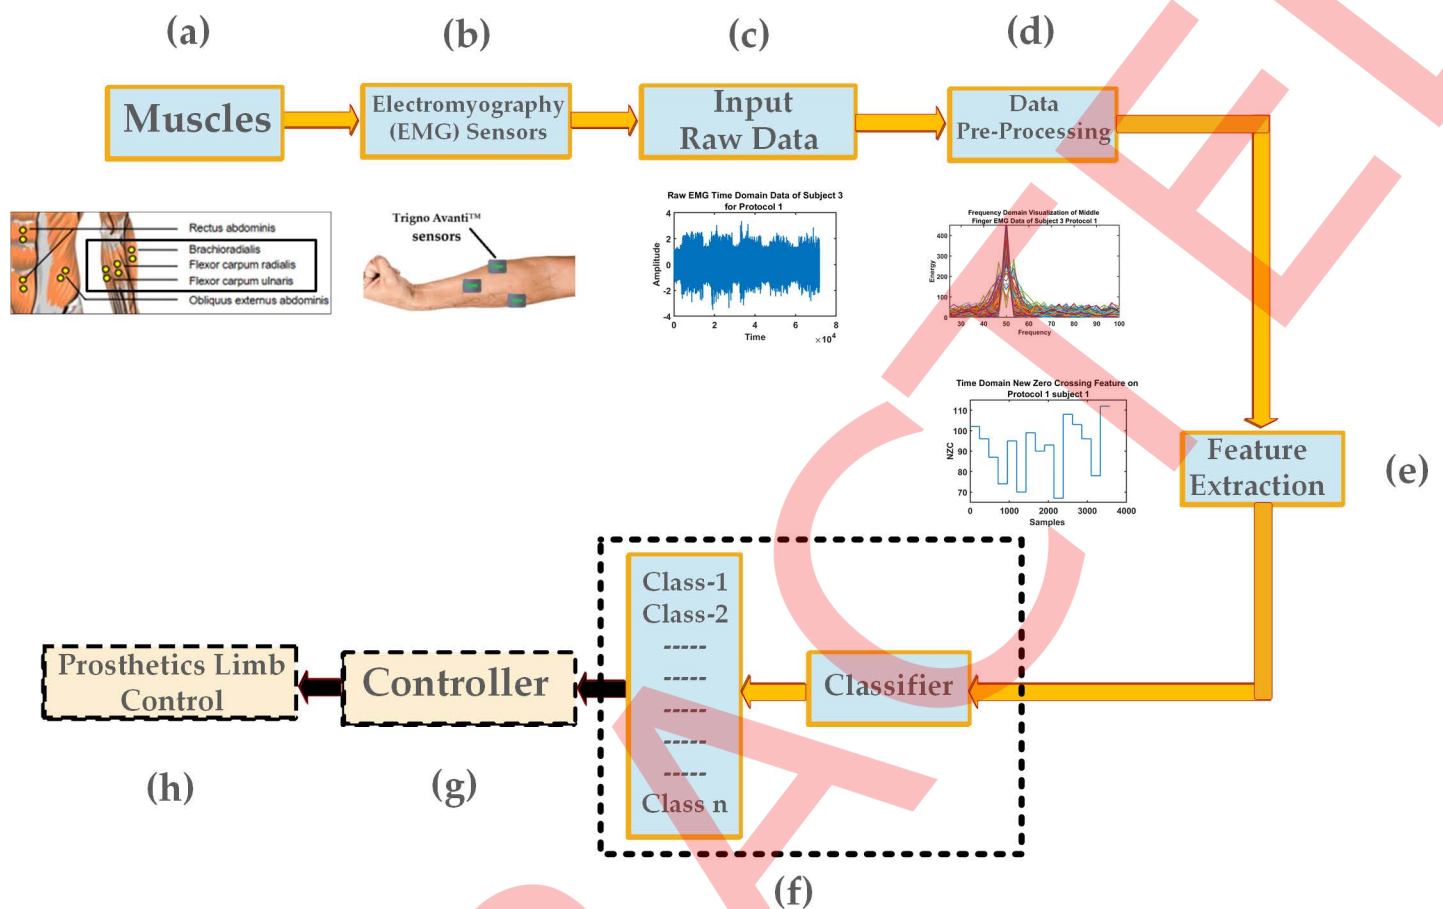

**Fig 1. Block diagram from recording to prosthetic control** (a) muscles selection (b) EMG sensors placement on muscles sites (c) collection of raw EMG data (d) bandpass and notch filters implementation to remove noises (e) time domain, frequency domain or time-frequency domain features extraction (f) classifier implementation using input features, classes or labels show specific movements (g) controller takes classes as input and provide specific signals to prototype (h) prosthetic limbs are actuator that perform specific actions on the basis of input from controller.

<https://doi.org/10.1371/journal.pone.0322580.g001>

collection. Recordings were performed in a seated position, and Trigno Avanti wireless Bluetooth surface EMG sensors were randomly placed over the Flexor Carpi Radialis, Flexor Carpi Ulnaris, and Brachioradialis muscles for each participant. Participants were instructed on how to perform the motions and were visually cued during signal recording. The motion classes performed included: (1) single finger extension: thumb, index, middle, ring, and little; (2) two-finger extension: thumb-index, index-middle, middle-ring, ring-little, and little-thumb; and (3) three-finger extension: thumb-index-middle, index-middle-ring, middle-ring-little, thumb-ring-little, and thumb-index-little.

## D. Data analysis

### i. Pre-processing and feature extraction

The electromyography (EMG) signals were processed using a 45th-order finite impulse response (FIR) band-pass filter, designed to selectively pass frequencies between 20 Hz and 450 Hz, with cutoff frequencies normalized to the Nyquist frequency ( $fs/2$ ). A second-order Infinite Impulse Response (IIR) notch filter was also employed to reject power line

interference, implemented to meet power line removal requirements. The filtered signals were then segmented into 4s epochs, with the first and last second of each 6s repetition removed to avoid potential delays between the cue and movement onset. Visual inspection was performed to ensure accurate identification of movement onsets. Two feature sets were extracted from the preprocessed signals: a 40 time domain features' set and a 6 frequency domain features' set. Features were extracted from 300-ms data windows with 50% overlap. Eight time-domain windows were used separately for feature extraction. Seven classifiers were employed separately to compare performance measures using the separate window technique in pre-processing and separate feature sets (Fig 2).

The pre-processed EMG signals were used to extract two feature sets: time-domain and frequency-domain. A comprehensive list of 40 time-domain features and 6 frequency-domain features were extracted, as presented in Tables 2 and 3, respectively. These features were selected to capture the underlying characteristics of the EMG signals, providing a robust representation for classification.

### ii. Time domain windows in pre-processing

Windowing techniques are essential in signal processing to reduce edge effects, improve frequency resolution, and prevent spectral leakage. They facilitate feature extraction by segmenting the signal into manageable parts. This enables accurate analysis and representation of the signal.

Windowing techniques are crucial in numerous fields, including image, audio, and biomedical signal processing. The windowed EMG signal, denoted as  $x_w(g_i)$ , can be obtained by convolving the original EMG signal,  $x_i(g_i)$ , with the window function (Table 4),  $w_i(g_i)$ .

### iii. Classifiers

Classifiers, listed in the Table 5, are algorithms that categorize data into predefined classes or labels based on extracted features. They enable accurate identification, prediction, and decision making in numerous applications. Classifiers, are widely used in fields like speech recognition, image recognition, and biomedical signals analysis.

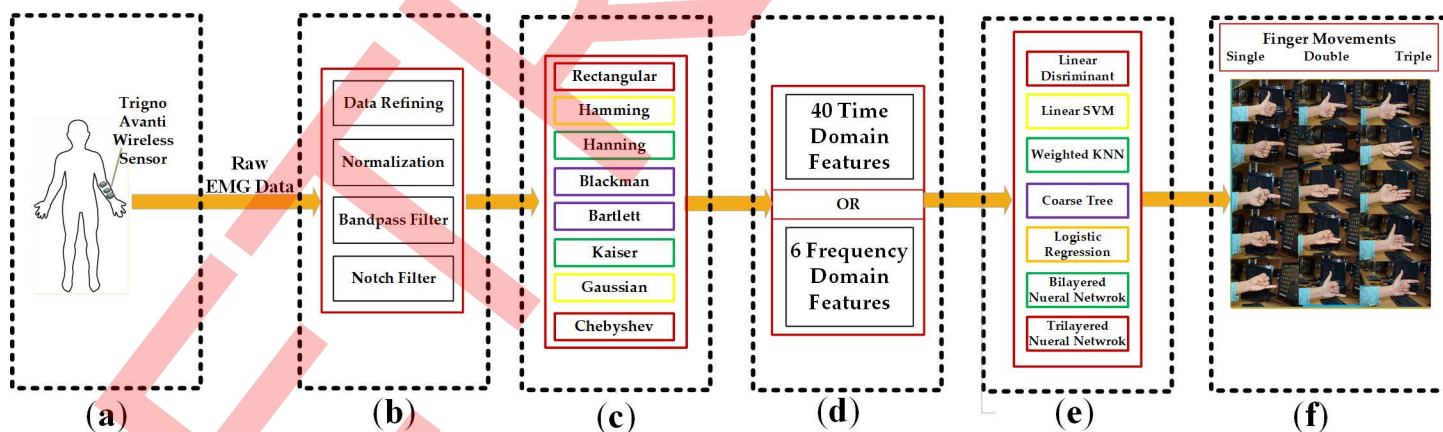

**Fig 2. Complete detail of the control study design (a) subject: source of EMG data collection (b) data refining and initially preprocessing of the raw EMG data (c) segmentation: eight individual time domain windowing techniques used for the segmentation of refined preprocessed data (d) feature set: two feature sets involved in this study, 40 time domain features and 6 frequency domain features (e) classifiers: seven individual classifiers are implemented and compared (f) protocol: fifteen finger movements comprises of individual, dual and triple fingers movements are the final output of classifiers that may be provided to the control system for the prosthetic control.**

<https://doi.org/10.1371/journal.pone.0322580.g002>

**Table 2. Time-domain feature set: forty features with descriptions.**

| Sr. No. | Feature Name                                        | Short Form | Description                                                                            |
|---------|-----------------------------------------------------|------------|----------------------------------------------------------------------------------------|
| 1.      | Mean Absolute Value                                 | MAV        | The EMG signal's average absolute value is quantified.                                 |
| 2.      | Waveform Length                                     | WL         | The waveform's cumulative length is quantified.                                        |
| 3.      | Zero Crossing                                       | ZC         | Zero-amplitude crossings are counted.                                                  |
| 4.      | Root Mean Square                                    | RMS        | EMG signal power is measured.                                                          |
| 5.      | Variance                                            | VAR        | Variance represents amplitude dispersion around its mean.                              |
| 6.      | Standard Deviation                                  | Std        | It represents amplitude dispersion around its mean.                                    |
| 7.      | Skewness                                            | SKEW       | Skewness quantifies EMG signal distribution asymmetry.                                 |
| 8.      | Kurtosis                                            | KURT       | Kurtosis quantifies signal distribution peakedness/flatness.                           |
| 9.      | Slope Sign Change                                   | SSC        | Zero crossings count slope sign changes.                                               |
| 10.     | Median                                              | MED        | Median indicates central tendency.                                                     |
| 11.     | Minimum                                             | Min        | Minimum amplitude is the smallest recorded value.                                      |
| 12.     | Maximum                                             | Max        | Peak amplitude is the highest absolute value.                                          |
| 13.     | Absolute Value of The Summation of Exponential Root | ASER       | It captures EMG signal energy and variability.                                         |
| 14.     | Mean Absolute Deviation                             | MAD        | It represents average absolute signal deviation.                                       |
| 15.     | Average Energy                                      | ME         | Average Energy measures EMG signal power over time.                                    |
| 16.     | Interquartile                                       | IQ         | Interquartile Range (IQR) measures EMG signal variability.                             |
| 17.     | Temporal moment 3                                   | TM3        | It represents EMG signal skewness magnitude.                                           |
| 18.     | Temporal moment 4                                   | TM4        | Fourth moment measures EMG signal kurtosis magnitude.                                  |
| 19.     | Temporal moment 5                                   | TM5        | Fifth moment measures EMG signal distribution.                                         |
| 20.     | V Order                                             | VO         | Higher-order statistics capture signal amplitude distribution.                         |
| 21.     | Integral Absolute Value                             | IAV        | It represents summation of the absolute values of an EMG signal over a period of time. |
| 22.     | Multiple Hamming Window                             | MHW        | Hamming window analysis segments EMG signals.                                          |
| 23.     | Mean of the Square Root                             | MSR        | This feature captures EMG signal energy and variability.                               |
| 24.     | Absolute Value of The Summation of Square Root      | ASSR       | It measures EMG signal energy and variability.                                         |
| 25.     | Integrated EMG                                      | IEMG       | Integrated Absolute Value (IAV) measures EMG signal area.                              |
| 26.     | Modified Mean Absolute Value Type 1                 | MMAV1      | It emphasizes signal subsets.                                                          |
| 27.     | Difference Absolute Mean Value                      | DAMV       | It measures consecutive EMG differences.                                               |
| 28.     | Difference Absolute Standard Deviation              | DASDV      | It quantifies EMG variability.                                                         |
| 29.     | Difference Variance Value                           | DVARV      | It quantifies variability in consecutive EMG samples.                                  |
| 30.     | Approximate Entropy                                 | AENT       | Approximate Entropy measures EMG signal complexity.                                    |
| 31.     | Maximum Fractal Length                              | MFL        | It measures the complexity and variability of the signal.                              |
| 32.     | Modified Mean Absolute Value 2                      | MMAV2      | It provides refined EMG analysis compared to MAV1.                                     |
| 33.     | Average Amplitude Change                            | AAC        | It measures consecutive EMG differences.                                               |
| 34.     | Simple Square Integral                              | SSI        | It represents the total power of the EMG signal.                                       |
| 35.     | Log Coefficient Of Variation                        | LCV        | It measures the relative variability of the signal.                                    |
| 36.     | Log Detector                                        | LD         | It measures the logarithmic energy of the signal                                       |
| 37.     | Coefficient Of Variation                            | CV         | It measures dispersion of data points around the mean.                                 |
| 38.     | New Zero Crossing                                   | NZC        | It measures signal frequency and muscle activity.                                      |
| 39.     | Log Difference Absolute Mean Value                  | LDAMV      | It represents signal changes from one point to the next.                               |
| 40.     | Cardinality                                         | CARD       | It represents unique values quantifies signal diversity.                               |

<https://doi.org/10.1371/journal.pone.0322580.t002>

**Table 3. Frequency-domain feature set: six features with descriptions.**

| Sr. No. | Feature Name       | Short Form | Description                                                       |
|---------|--------------------|------------|-------------------------------------------------------------------|
| 1.      | Mean Frequency     | MF         | It represents the average frequency of a signal's power spectrum. |
| 2.      | Median Frequency   | MDF        | It divides the EMG power spectrum into two equal parts.           |
| 3.      | Band Power         | BP         | It measures average EMG power within a frequency band.            |
| 4.      | Occupied Bandwidth | OBW        | It contains a specified percentage of signal power.               |
| 5.      | Peak Amplitude     | PA         | It represents the maximum amplitude within a frequency range.     |
| 6.      | Power Bandwidth    | PBW        | It defines the frequency range of significant EMG power.          |

<https://doi.org/10.1371/journal.pone.0322580.t003>

**Table 4. Time-domain windowing techniques for EMG data preprocessing: mathematical formulas and descriptions.**

| Sr. No | Window Name        | Mathematical Formula                                                                                      | Description                                                                                                                 |
|--------|--------------------|-----------------------------------------------------------------------------------------------------------|-----------------------------------------------------------------------------------------------------------------------------|
| 1.     | Rectangular Window | $w_1(g_1) = 1, 0 \leq g_1 \leq M_1 - 1$                                                                   | Divides the signal into equal segments, allowing for simple and efficient feature extraction.                               |
| 2.     | Hamming Window     | $w_2(g_2) = 0.54 - 0.46 * \cos(2 * \pi * g_2 / (M_2 - 1))$                                                | Similar to Hamming, but with a more gradual tapering, reducing edge effects and improving feature extraction.               |
| 3.     | Hann Window        | $w_3(g_3) = 0.5 * (1 - \cos(2 * \pi * g_3 / (M_3 - 1)))$                                                  | Similar to Hamming, but with a more gradual tapering, reducing edge effects and improving feature extraction.               |
| 4.     | Blackman Window    | $w_4(g_4) = 0.42 - 0.5 * \cos(2 * \pi * g_4 / (M_4 - 1)) + 0.08 * \cos(4 * \pi * g_4 / (M_4 - 1))$        | Provides better edge effect reduction and noise suppression, resulting in more accurate feature extraction.                 |
| 5.     | Bartlett Window    | $w_5(g_5) = 1 - \left(\frac{2g_5 - (M_5 - 1)}{M_5 - 1}\right)^2$                                          | Offers a simple, triangular tapering, reducing edge effects and improving feature extraction.                               |
| 6.     | Kaiser Window      | $w_6(g_6) = I_0\left(\beta_m \sqrt{1 - \frac{(2g_6 - N_6 + 1)^2}{(N_6 - 1)^2}}\right) / I_0(\beta_m)$     | Allows for adjustable tapering, providing a trade-off between edge effect reduction and feature extraction accuracy.        |
| 7.     | Gaussian Window    | $w_7(g_7) = e^{-\left(\frac{g_7 - \frac{(M_7 - 1)}{2}}{\sigma_m}\right)^2}$                               | Uses a Gaussian curve to taper the signal, providing a smooth transition between segments and improving feature extraction. |
| 8.     | Chebyshev Window   | $w_8(g_8) = \frac{1 + \varepsilon_m T_{M_8 - 1}\left(\frac{2g_8 - 1}{M_8 - 1}\right)}{1 + \varepsilon_m}$ | Offers a flexible tapering approach, providing a trade-off between edge effect reduction and feature extraction accuracy.   |

<https://doi.org/10.1371/journal.pone.0322580.t004>

#### iv. Statistics

To evaluate the performance, All statistical analyses were performed using MATLAB (R2022b). The Classification Learner app in MATLAB facilitated the classification process by allowing the input of features and labels, providing options for N-fold cross-validation (where N=4 in this study), and offering a range of classifiers. The app trained and evaluated draft models on the validation dataset, yielding classification accuracies for each classifier.

We performed a two-way ANOVA to examine the effects of window technique and classifier on classification accuracy. The ANOVA model included the main effects of window technique and classifier, as well as their interaction term. The results of the ANOVA showed a significant main effect of window technique ( $F(7,42) = 12.11, p < 0.001$ ), indicating that the choice of window technique significantly affected classification accuracy. The results also showed a significant main effect of classifier ( $F(6,42) = 18.75, p < 0.001$ ), indicating that the choice of classifier significantly affected classification accuracy. We also performed a post-hoc analysis using the Tukey's honestly significant difference (HSD) test to examine the pairwise differences between the window techniques and classifiers. The results of the post-hoc analysis showed that the Rectangular window with L-SVM classifier achieved the highest classification accuracy, which was significantly higher than the other window techniques and classifiers ( $p < 0.05$ ).

**Table 5. Classifiers used in recognition of EMG data: mathematical formulations and descriptions.**

| Sr.No | Window Name | Mathematical Formula or Notation                                           | Description                                                                                                    |
|-------|-------------|----------------------------------------------------------------------------|----------------------------------------------------------------------------------------------------------------|
| 1.    | LD          | $y_f = W_f^T x_f$                                                          | Separates classes using a linear decision boundary, suitable for linearly separable data.                      |
| 2.    | L-SVM       | $y_s (w^T x_s + b_s) \geq 1 \quad \forall s$                               | Finds the optimal linear decision boundary to separate classes, using support vectors.                         |
| 3.    | W-KNN       | $f(x_k) = \sum_{k=1}^K w_k \cdot y_k$                                      | Classifies data based on the majority vote of its k-nearest neighbors, with weights assigned to each neighbor. |
| 4.    | Coarse Tree | IF ( $x_m < c_m$ )<br>THEN IF ( $x_n > c_n$ ) THEN CLASS A<br>ELSE CLASS B | Uses a decision tree with a coarse structure to classify data, suitable for handling large datasets.           |
| 5.    | LR          | $y_m = \sigma_m (w_m x_m + b_m)$                                           | Applies logistic regression with a kernel trick to separate classes, suitable for non-linearly separable data. |
| 6.    | BNN         | $y_n = \text{softmax} (W_n h_k + b_n)$                                     | Uses two hidden layers to learn complex patterns in data and classify it accurately.                           |
| 7.    | TNN         |                                                                            | Employs three hidden layers to learn intricate relationships in data and achieve high classification accuracy. |

<https://doi.org/10.1371/journal.pone.0322580.t005>

### III. Results

The experimental results of the comprehensive comparison of eight window techniques and seven classifiers for upper limb classification using time-domain and frequency-domain features are presented. The performance metrics used in the analysis include classification accuracy and classification error. Fig 3 illustrates the performance of classifiers with time-domain windows using multimodal features. The classifiers' ranks, denoted by values 1–7, are also presented. Fig 4 displays the classification errors obtained by classifiers with time-domain windows using multimodal features.

The Rectangular window with L-SVM classifier achieved the highest classification accuracy of 99.98% and the lowest classification error of 0.02% using time-domain features. In contrast, the Blackman window with LD classifier achieved the

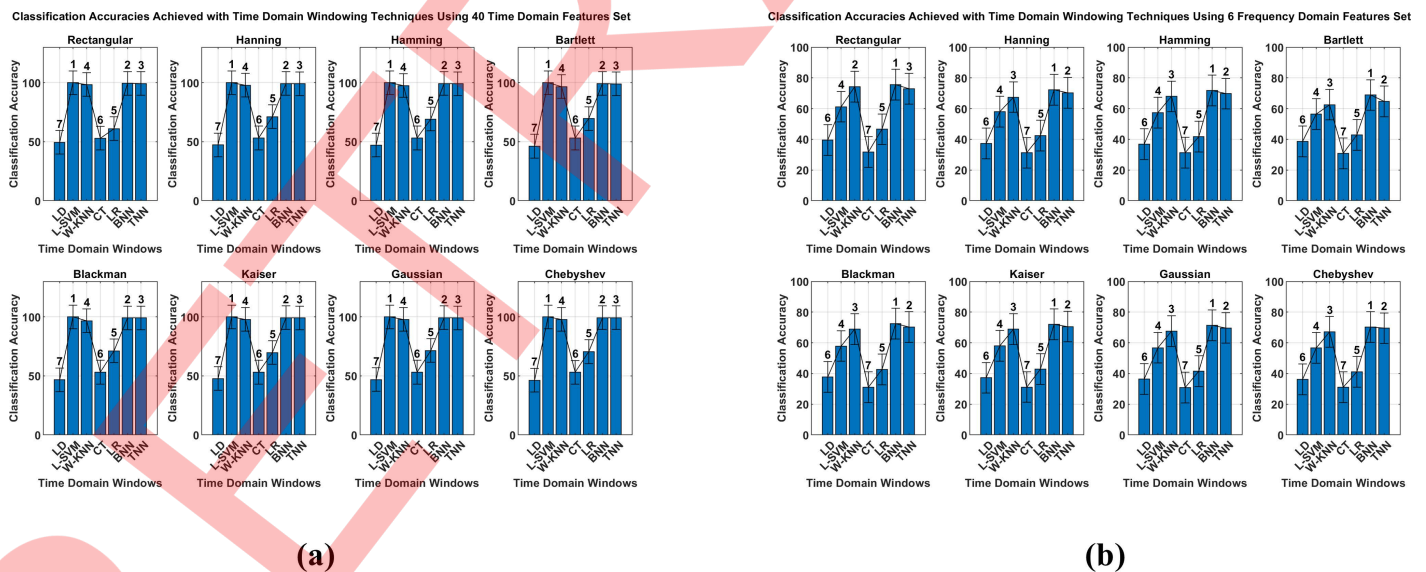

**Fig 3. Classification accuracy of time-domain windowing techniques combined with (a) time-domain features and (b) frequency-domain features for 15 subjects performing 15 movements.**

<https://doi.org/10.1371/journal.pone.0322580.g003>

lowest classification accuracy of 46.19% and the highest classification error of 53.81% using time-domain features. Using frequency-domain features, the Rectangular window with BNN Classifier achieved the highest classification accuracy of 75.53% and the lowest classification error of 24.47%. The performance of the classifiers was also influenced by the choice of window technique and feature domain.

The detailed performance metrics, including standard deviations (Fig 5), variances (Fig 6), ranges (Fig 7), coefficients of variation (Fig 8), maximum (Fig 9), minimum (Fig 10), and medians (Fig 11) of accuracies, provide further insights into

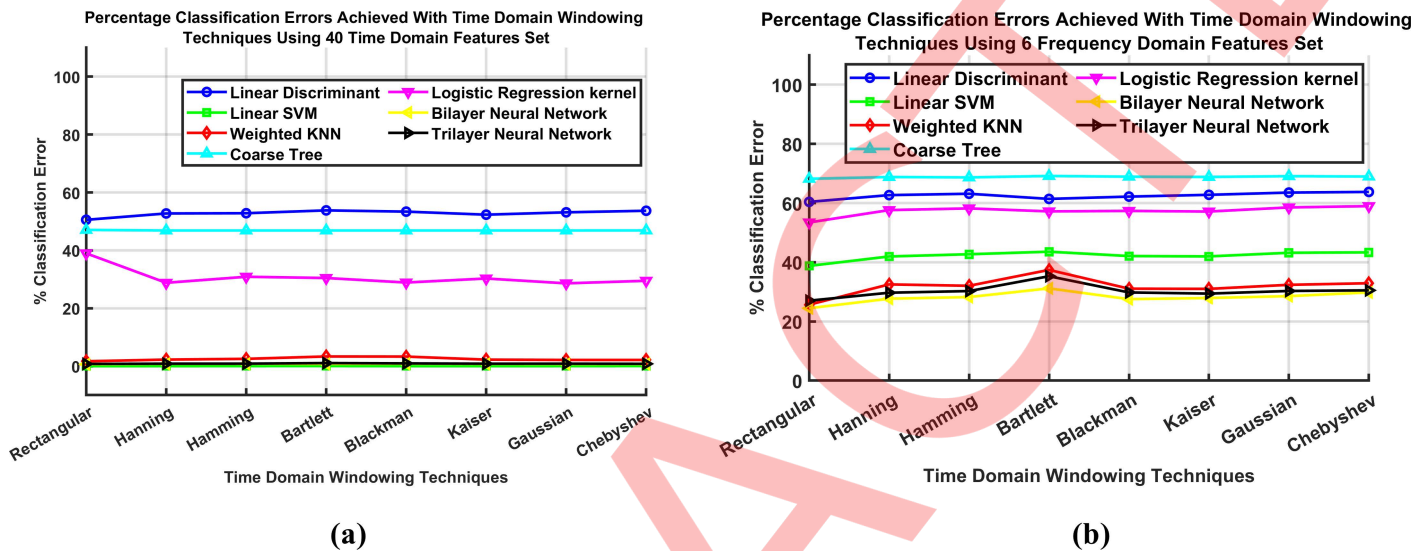

Fig 4. Classification error rates of time-domain windowing techniques combined with (a) time-domain features and (b) frequency-domain features for 15 subjects performing 15 movements.

<https://doi.org/10.1371/journal.pone.0322580.g004>

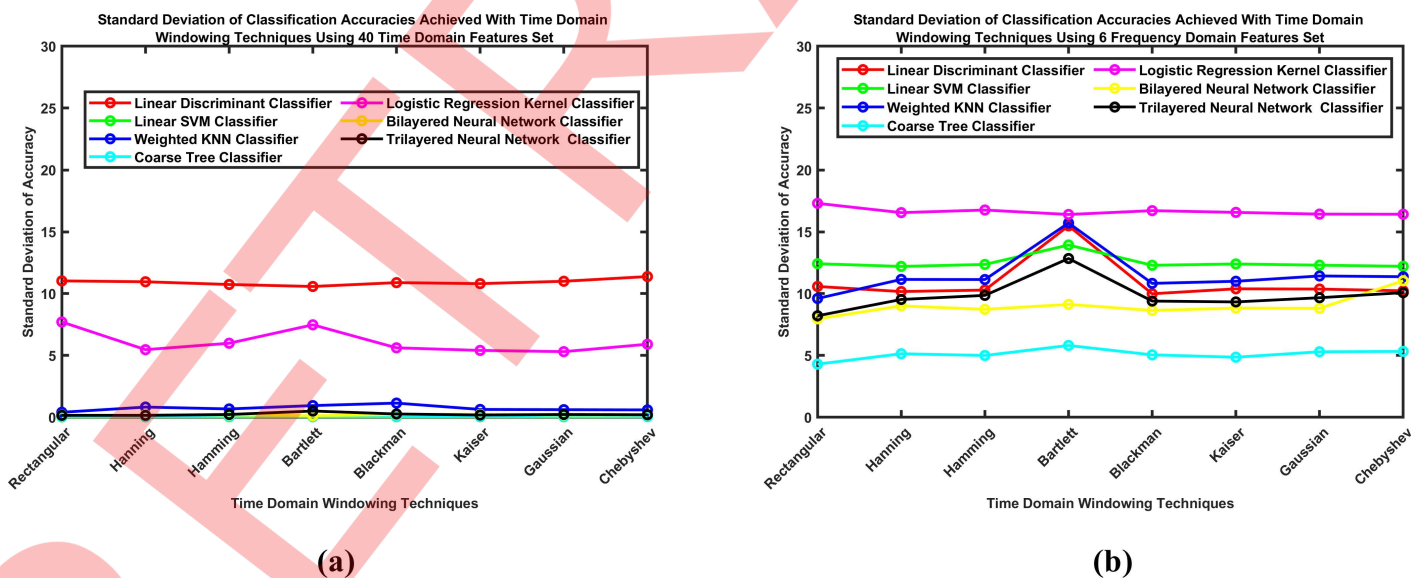

Fig 5. Standard deviations of classification accuracies using time-domain windowing techniques in preprocessing for 15 subjects performing 15 movements, evaluated with (a) time-domain feature sets and (b) frequency-domain feature sets.

<https://doi.org/10.1371/journal.pone.0322580.g005>

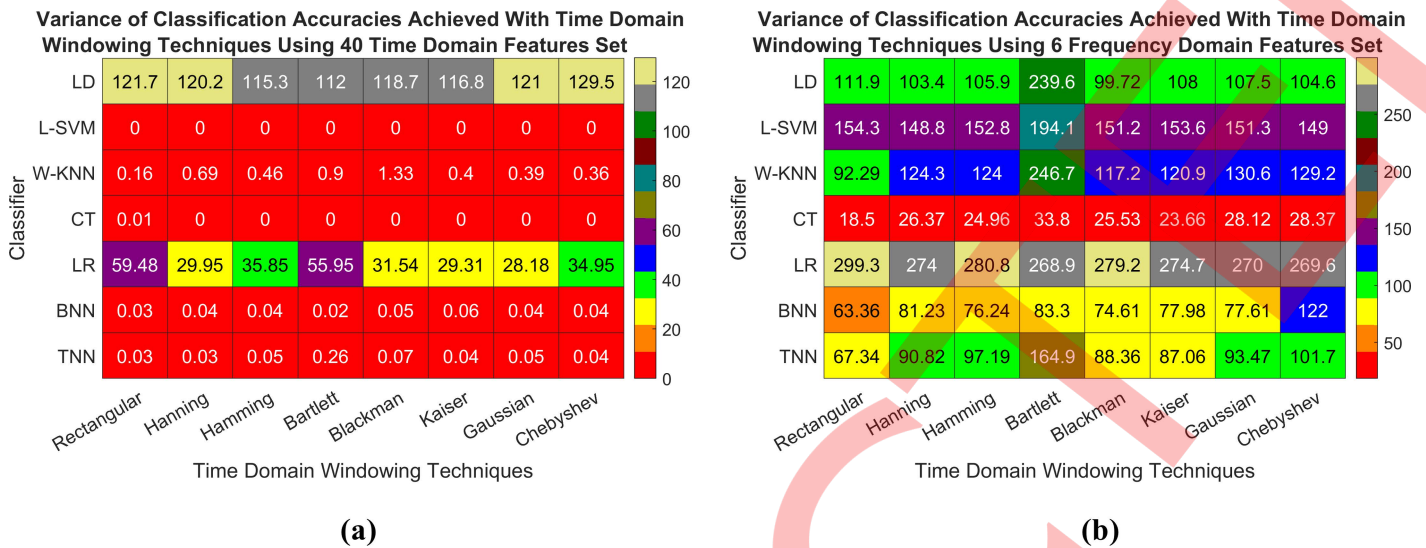

**Fig 6. Variance in classification accuracies using time-domain windowing techniques in preprocessing for 15 subjects performing 15 movements, evaluated with (a) time-domain feature sets and (b) frequency-domain feature sets.**

<https://doi.org/10.1371/journal.pone.0322580.g006>

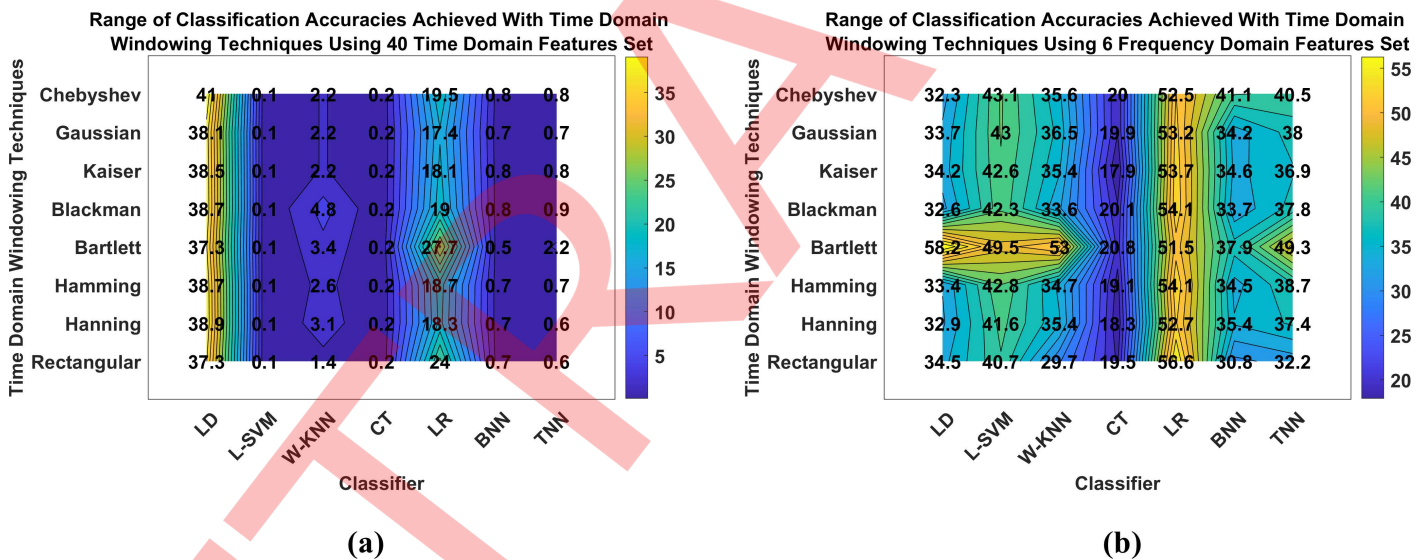

**Fig 7. Range of classification accuracies achieved by classifiers using time-domain windowing techniques in preprocessing for 15 subjects performing 15 movements, evaluated with (a) time-domain feature sets and (b) frequency-domain feature sets.**

<https://doi.org/10.1371/journal.pone.0322580.g007>

the performance of the window techniques and classifiers. The performance metrics presented in Figs 5–11 were carefully selected to provide a comprehensive evaluation of the classifiers' performance. Specifically, we examined consistency (standard deviation), dispersion (variance), spread (range), best-case scenario (maximum), worst-case scenario (minimum), and central tendency (median) of classification accuracies. This comprehensive evaluation enables a more nuanced understanding of the strengths and limitations of each classifier, facilitating a detailed comparison of classifier performance across different feature sets and windowing techniques.

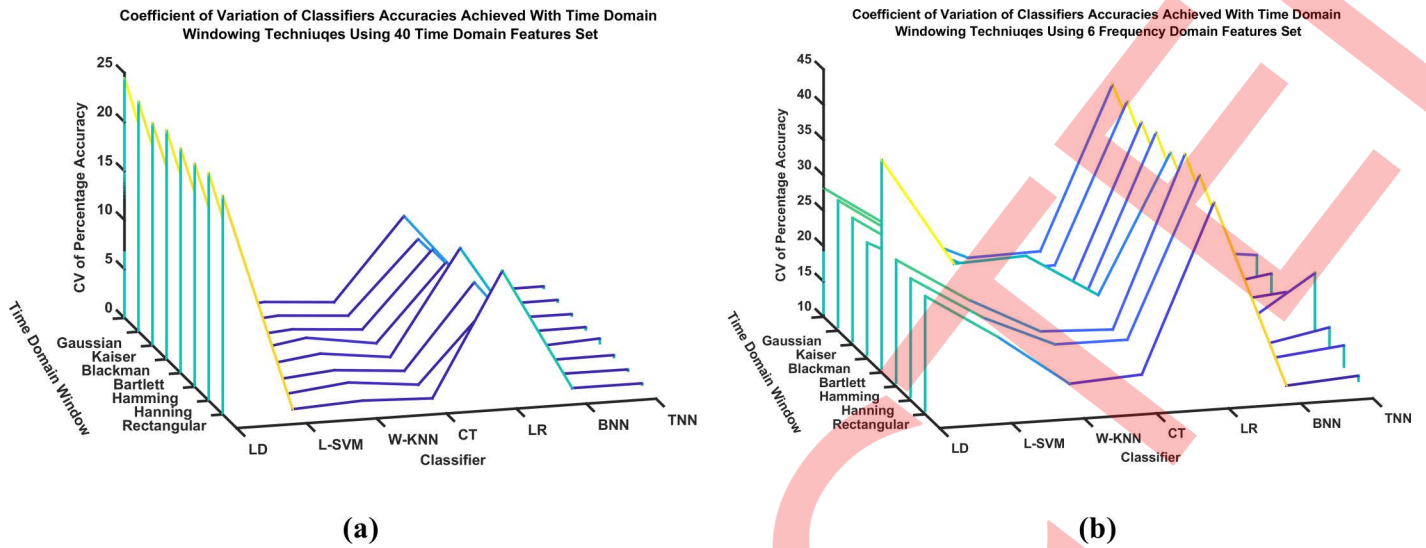

**Fig 8. Coefficient of variations of accuracies of classifiers with time domain windows technique in preprocessing for 15 subjects performing 15 movements (a) using time domain features set (b) using frequency domain features set.**

<https://doi.org/10.1371/journal.pone.0322580.g008>

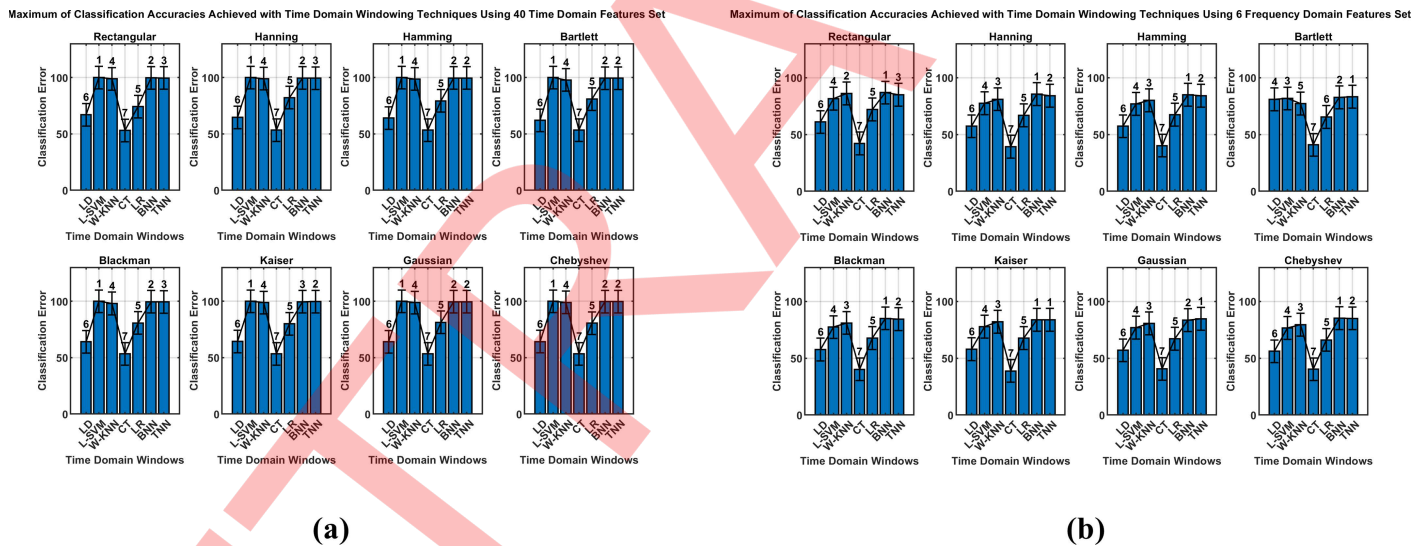

**Fig 9. Maximum of classification accuracies achieved with time domain windows technique in preprocessing for 15 subjects performing 15 movements (a) using time domain features set (b) using frequency domain features set.**

<https://doi.org/10.1371/journal.pone.0322580.g009>

Tables 6 and 7 show the performance of classifiers using time-domain windows with time-domain features and frequency-domain features, respectively. The BNN classifier achieved the highest overall performance using frequency domain features, while the Linear Support Vector Machine demonstrated exceptional performance using time domain features.

The L-SVM classifier consistently outperformed other classifiers, particularly when paired with the Rectangular window and using time-domain features. In contrast, the Coarse Tree Classifier was often one of the lowest-performing classifiers, particularly when paired with the Blackman window and using frequency-domain features.

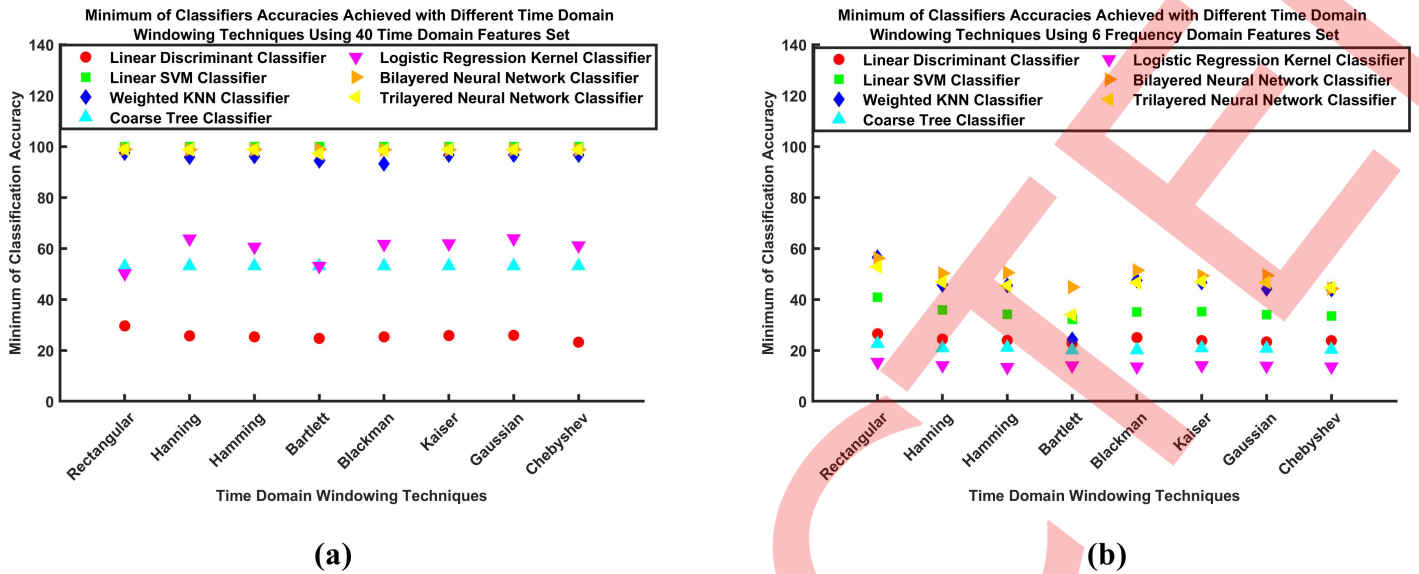

**Fig 10. Minimum of accuracies of classifiers with time domain windows technique in preprocessing for 15 subjects performing 15 movements (a) using time domain features set (b) using frequency domain features set.**

<https://doi.org/10.1371/journal.pone.0322580.g010>

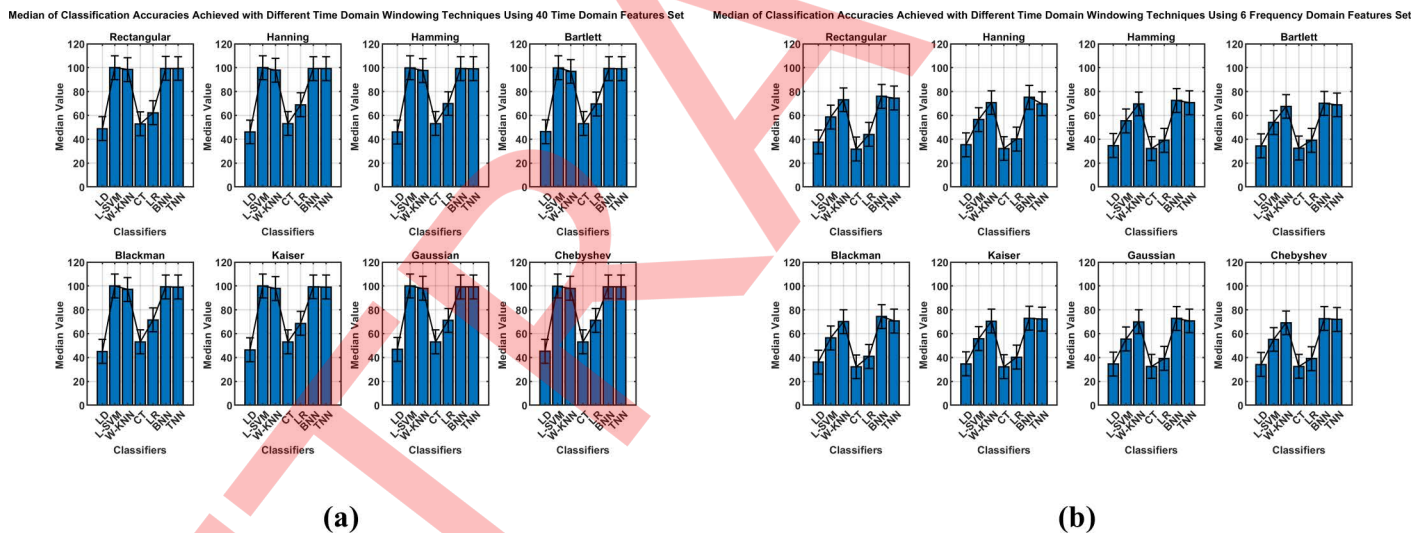

**Fig 11. Median of accuracies of classifiers with time domain windows technique in preprocessing for 15 subjects performing 15 movements (a) using time domain features set (b) using frequency domain features set.**

<https://doi.org/10.1371/journal.pone.0322580.g011>

Confusion matrices for the worst-case and optimal performances of the classifiers are presented in [Figs 12–15](#), highlighting the classification accuracy and error rates for each classifier. Overall, the results indicate that the Rectangular window with L-SVM classifier achieved the best performance using time domain features, while the Rectangular window with BNN classifier achieved the best performance using frequency domain features. The performance metrics of classifiers employing 6 frequency-domain features and 40 time-domain features, both with Rectangular window preprocessing, are summarized in [Tables 8](#) and [9](#), respectively.

**Table 6. Classification accuracy comparison of 7 classifiers using 40 time-domain features with time-domain windowing techniques for preprocessing.**

| Time Domain Window | LD    | L-SVM | W-KNN | C-Tree | LR    | BNN   | TNN   |
|--------------------|-------|-------|-------|--------|-------|-------|-------|
| Rectangular        | 49.45 | 99.98 | 98.31 | 52.94  | 61.02 | 99.35 | 99.23 |
| Hamming            | 47.25 | 99.96 | 97.73 | 53.13  | 71.20 | 99.20 | 99.14 |
| Hanning (Hann)     | 47.17 | 99.94 | 97.47 | 53.13  | 69.12 | 99.19 | 99.13 |
| Blackman           | 46.19 | 99.93 | 96.65 | 53.13  | 69.55 | 99.21 | 98.93 |
| Bartlett           | 46.62 | 99.96 | 96.69 | 53.13  | 71.11 | 99.15 | 99.04 |
| Kaiser             | 47.67 | 99.96 | 97.74 | 53.13  | 69.72 | 99.23 | 99.15 |
| Gaussian           | 46.86 | 99.95 | 97.85 | 53.13  | 71.39 | 99.26 | 99.14 |
| Chebyshev          | 46.32 | 99.93 | 97.86 | 53.11  | 70.51 | 99.27 | 99.19 |

**Note:** Unless otherwise specified, the following parameters were used for all time-domain windows: window size = 300 ms, overlap = 50%. Additionally, the following specific parameters were used: Kaiser window ( $\beta=0.5$ ), Gaussian window ( $\sigma=2.5$ ), and Chebyshev window (ripple = 60 dB).

<https://doi.org/10.1371/journal.pone.0322580.t006>

**Table 7. Classification accuracy comparison of machine learning models using 6 frequency-domain features extracted with time-domain windowing techniques in preprocessing.**

| Time Domain Window | LD    | L-SVM | W-KNN | C-Tree | LR    | BNN   | TNN   |
|--------------------|-------|-------|-------|--------|-------|-------|-------|
| Rectangular        | 39.59 | 61.23 | 74.33 | 31.80  | 46.55 | 75.53 | 72.98 |
| Hamming            | 37.31 | 58.04 | 67.48 | 31.19  | 42.37 | 72.31 | 70.29 |
| Hanning (Hann)     | 36.85 | 57.29 | 67.95 | 31.32  | 41.80 | 71.76 | 69.73 |
| Blackman           | 38.59 | 56.43 | 62.58 | 30.84  | 42.81 | 68.82 | 64.72 |
| Bartlett           | 37.81 | 57.90 | 68.93 | 31.08  | 42.65 | 72.47 | 70.20 |
| Kaiser             | 37.21 | 58.02 | 68.99 | 31.17  | 42.86 | 72.07 | 70.59 |
| Gaussian           | 36.45 | 56.79 | 67.62 | 30.91  | 41.47 | 71.45 | 69.70 |
| Chebyshev          | 36.23 | 56.65 | 67.09 | 31.03  | 41.03 | 70.19 | 69.49 |

**Note:** Unless otherwise specified, the following parameters were applied to all time-domain windows: window size = 300 ms, overlap = 50%. Specific parameters for each window type were as follows: Kaiser window ( $\beta=0.5$ ), Gaussian window ( $\sigma=2.5$ ), and Chebyshev window (ripple = 60 dB).

<https://doi.org/10.1371/journal.pone.0322580.t007>

#### IV. Discussions

The practical implications of our study's findings are substantial. Specifically, our results indicate that the integration of rectangular windowing techniques and L-SVM classifiers can significantly enhance the accuracy and reliability of wearable sensors and prosthetic limbs. This, in turn, has the potential to improve rehabilitation outcomes, prosthetic limb control, and human-computer interaction. Moreover, our approach demonstrates promise for real-time classification of hand movements, thereby paving the way for the development of more sophisticated and effective assistive technologies.

The Rectangular window technique with the Support Vector Machine (SVM) classifier outperformed other classifiers, including LD, L-SVM, W-KNN, Coarse Tree, LR, BNN, and TNN Classifiers [27]. The SVM classifier's effectiveness in managing complex datasets aligns with previous research [27,28].

The Rectangular window technique's superior performance can be attributed to its ability to maintain the signal's spectral properties, crucial for precise classification [28]. The proposed algorithm leverages Welch power estimation derived from frequency analysis to classify 15 distinct finger movements using surface EMG signals [29]. Additionally, the Hanning FIR window has been shown to be effective in real-time EEG applications due to its ability to balance spectral leakage and frequency resolution [30]. Windowing filter techniques, including Rectangular, Bartlett, Hamming, Hanning, and Kaiser

**Model 6**

|     |       |       |       |       |       |       |       |       |       |       |       |       |       |       |       |
|-----|-------|-------|-------|-------|-------|-------|-------|-------|-------|-------|-------|-------|-------|-------|-------|
| 1   | 10.7% | 6.7%  | 6.4%  | 10.7% | 8.0%  | 6.5%  | 6.1%  | 3.7%  | 9.1%  | 7.7%  |       | 8.0%  | 8.8%  | 4.6%  | 6.6%  |
| 2   | 5.9%  | 9.6%  | 6.9%  | 5.1%  | 7.6%  | 5.0%  | 11.3% | 6.2%  | 6.2%  | 4.0%  | 1.4%  | 5.8%  | 9.1%  | 8.9%  | 7.8%  |
| 3   | 7.1%  | 5.0%  | 9.8%  | 11.6% | 4.0%  | 11.0% | 5.2%  | 8.6%  | 3.4%  | 2.8%  | 0.8%  | 6.9%  | 6.5%  | 11.4% | 9.0%  |
| 4   | 11.2% | 7.5%  | 11.3% | 7.9%  | 5.8%  | 6.0%  | 6.6%  | 4.9%  | 10.2% | 10.5% | 0.8%  | 4.0%  | 5.4%  | 7.8%  | 5.9%  |
| 5   | 5.9%  | 9.2%  | 6.4%  | 7.4%  | 11.6% | 7.0%  | 7.5%  | 4.9%  | 6.8%  | 12.1% | 1.1%  | 6.2%  | 5.7%  | 5.7%  | 5.5%  |
| 6   | 5.9%  | 6.7%  | 6.9%  | 5.1%  | 5.8%  | 8.5%  | 3.3%  | 8.0%  | 8.5%  | 5.3%  | 15.2% | 4.0%  | 5.4%  | 3.9%  | 5.5%  |
| 7   | 7.7%  | 9.2%  | 3.9%  | 6.0%  | 6.2%  | 5.0%  | 20.7% | 6.8%  | 5.1%  | 7.7%  | 2.0%  | 6.2%  | 3.7%  | 7.1%  | 7.0%  |
| 8   | 7.1%  | 5.0%  | 4.4%  | 7.0%  | 8.9%  | 6.5%  | 7.5%  | 10.5% | 8.0%  | 6.1%  | 0.3%  | 6.5%  | 8.5%  | 7.1%  | 10.2% |
| 9   | 7.1%  | 6.7%  | 10.3% | 11.2% | 4.0%  | 11.5% | 6.1%  | 8.6%  | 9.7%  | 2.4%  | 1.1%  | 7.2%  | 7.1%  | 6.4%  | 6.2%  |
| 10  | 7.7%  | 4.2%  | 3.9%  | 10.2% | 15.6% | 9.5%  | 6.1%  | 6.8%  | 10.8% | 18.6% |       | 6.5%  | 1.4%  | 3.9%  | 3.1%  |
| 11  | 1.8%  | 2.1%  | 0.5%  |       | 2.2%  | 3.5%  |       | 3.7%  |       | 0.4%  | 51.3% | 2.2%  | 4.8%  | 1.1%  | 0.8%  |
| 12  | 5.9%  | 7.5%  | 6.9%  | 2.8%  | 8.0%  | 6.0%  | 5.6%  | 9.9%  | 8.5%  | 7.3%  | 0.3%  | 10.5% | 7.1%  | 9.3%  | 7.0%  |
| 13  | 5.9%  | 6.7%  | 3.4%  | 2.8%  | 2.7%  | 2.0%  | 2.8%  | 4.3%  | 2.3%  | 3.2%  | 22.3% | 8.7%  | 10.2% | 5.3%  | 3.9%  |
| 14  | 5.3%  | 8.8%  | 11.3% | 7.9%  | 3.1%  | 5.5%  | 4.7%  | 4.3%  | 6.8%  | 6.5%  | 0.6%  | 10.9% | 8.5%  | 8.2%  | 7.8%  |
| 15  | 4.7%  | 5.4%  | 7.8%  | 4.2%  | 6.2%  | 6.5%  | 6.6%  | 8.6%  | 4.5%  | 5.3%  | 2.8%  | 6.5%  | 7.7%  | 9.3%  | 13.7% |
| PPV | 10.7% | 9.6%  | 9.8%  | 7.9%  | 11.6% | 8.5%  | 20.7% | 10.5% | 9.7%  | 18.6% | 51.3% | 10.5% | 10.2% | 8.2%  | 13.7% |
| FDR | 89.3% | 90.4% | 90.2% | 92.1% | 88.4% | 91.5% | 79.3% | 89.5% | 90.3% | 81.4% | 48.7% | 89.5% | 89.8% | 91.8% | 86.3% |
|     | 1     | 2     | 3     | 4     | 5     | 6     | 7     | 8     | 9     | 10    | 11    | 12    | 13    | 14    | 15    |

Predicted Class

**Fig 12. Confusion matrix illustrating the worst-case classification performance of the Logistic Regression (LR) classifier for Subject 5, using 6 frequency-domain features extracted with rectangular windowing.**

<https://doi.org/10.1371/journal.pone.0322580.g012>

windows, have also been applied to finite impulse response (FIR) filters for EEG signal processing [31]. Furthermore, the use of rectangular windows has been explored in detecting eye blinks using cross-correlation [32]. Studies have also demonstrated the effectiveness of SVM classifiers in improving movement recognition system accuracy [33,34] and the Rectangular window technique in speech recognition [35] and image processing [36]. The study's findings have significant implications for wearable sensors and prosthetic limbs requiring accurate upper limb movement recognition. The proposed approach can improve existing systems' accuracy and reliability, and can be applied to rehabilitation, prosthetics, and human-computer interaction [37–44]. However, limitations include the relatively small dataset and potential processing time limitations for real-time movement recognition.

Future studies can build upon our findings by addressing the limitations of this study, such as collecting larger datasets and optimizing processing time. Moreover, comparing our proposed approach with other state-of-the-art methods and exploring other machine learning algorithms, such as deep learning techniques, and sensors, like EEG or fNIRS, are promising research directions that can further advance the field of upper limb movement classification, ultimately contributing to the development of more accurate and reliable myoelectric control systems [39] and demonstrating the feasibility of using surface EMG signals for accurate upper limb movement classification [41].

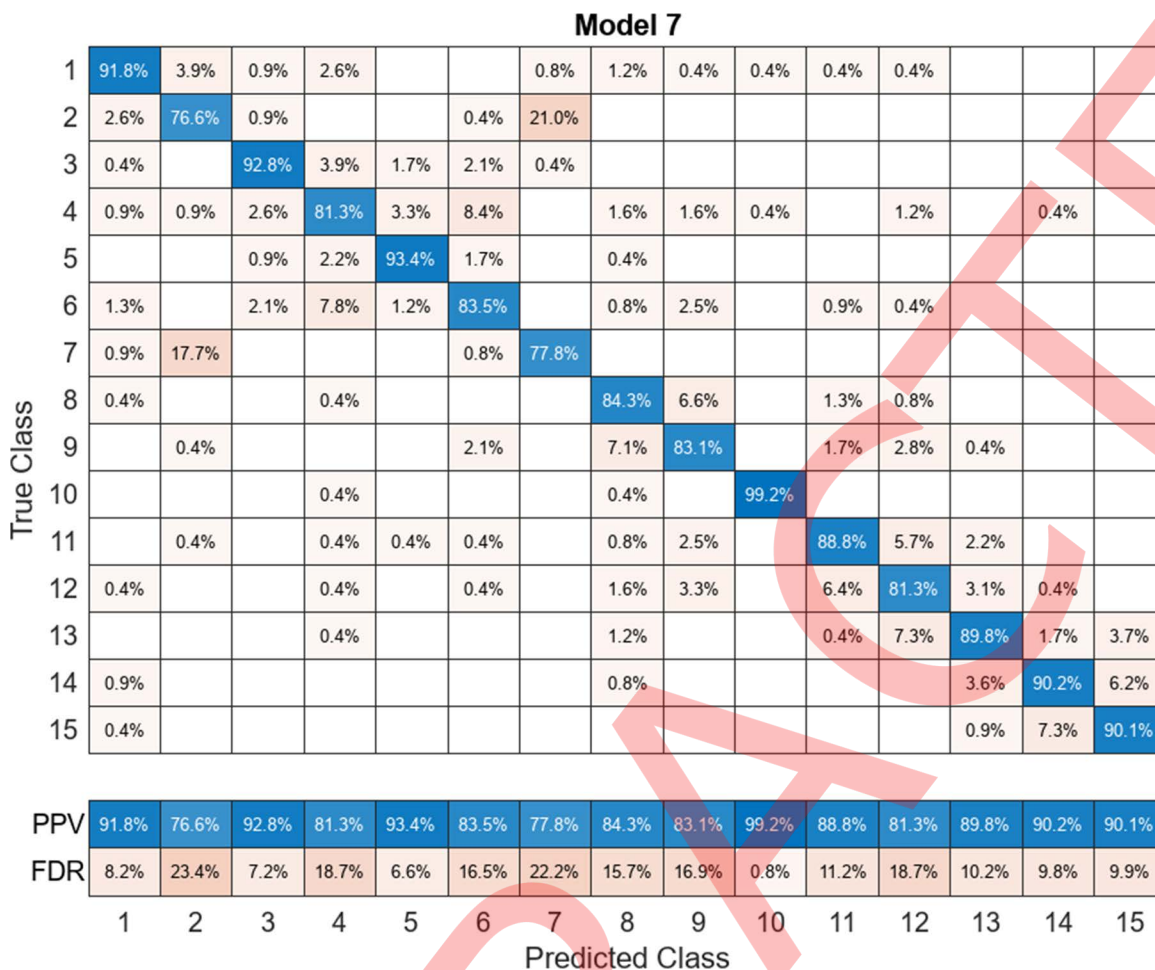

**Fig 13. Confusion matrix illustrating the optimal classification performance of the BNN classifier for Subject 12, using 6 frequency-domain features extracted with rectangular windowing.**

<https://doi.org/10.1371/journal.pone.0322580.g013>

Neurological disorders, such as stroke, spinal cord injury, and amyotrophic lateral sclerosis, result in significant motor function impairments, affecting millions of individuals worldwide. To address the need for innovative and effective interventions, this study investigates the efficacy of electromyography (EMG) decoding in improving motor function outcomes. Specifically, we aim to develop a novel EMG-based hand movement classification system, leveraging advanced signal processing techniques and machine learning algorithms. Our objectives are to: (1) optimize the performance of EMG decoding using time-domain windowing techniques, feature selection, and classifier choice, and (2) evaluate the effectiveness of the proposed system in classifying 15 distinct finger movements. By achieving a high validation accuracy of 99.98%, this study contributes to the development of more accurate and reliable myoelectric control systems, ultimately enhancing rehabilitation outcomes and quality of life for individuals with neurological disorders. This has significant implications for the development of more accurate and reliable prosthetic limbs and wearable sensors. Additionally, the study's findings can inform the development of more efficient and accurate upper limb movement classification systems, which can be used in various applications such as rehabilitation, prosthetics, and human-computer interaction. Despite the significance of our findings, we acknowledge several limitations of the study. Firstly, the sample size was relatively small, which may limit the generalizability of the results. Secondly, the study's duration was relatively short, which may not

|     |                 |       |       |       |       |       |       |       |       |       |       |       |       |       |       |
|-----|-----------------|-------|-------|-------|-------|-------|-------|-------|-------|-------|-------|-------|-------|-------|-------|
| 1   | 31.7%           | 2.3%  | 11.4% | 8.7%  | 4.4%  | 0.7%  | 8.3%  | 7.3%  | 0.7%  | 7.6%  |       | 13.0% |       | 0.5%  | 0.6%  |
| 2   | 6.0%            | 42.7% | 7.4%  | 3.5%  | 6.1%  | 13.3% | 10.5% | 0.7%  | 4.0%  | 3.1%  | 2.2%  | 1.1%  | 5.6%  | 0.5%  | 2.5%  |
| 3   | 13.1%           | 7.3%  | 14.9% | 10.2% | 3.9%  | 3.0%  | 5.8%  | 13.4% | 7.4%  | 4.8%  |       | 4.0%  | 2.0%  | 2.5%  | 1.2%  |
| 4   | 5.5%            | 5.0%  | 10.3% | 16.0% | 2.2%  | 7.4%  | 9.4%  | 5.6%  | 8.1%  | 4.8%  | 1.1%  | 5.1%  | 2.4%  | 6.4%  | 6.8%  |
| 5   | 14.1%           | 3.2%  | 8.6%  | 4.5%  | 27.6% | 0.7%  | 5.1%  | 1.5%  | 2.7%  | 22.0% | 1.8%  | 1.7%  |       | 2.0%  | 3.1%  |
| 6   | 0.5%            | 3.6%  | 6.3%  | 17.2% | 2.2%  | 6.7%  | 7.2%  | 3.7%  | 2.0%  | 4.2%  | 5.1%  | 1.1%  | 22.3% | 3.9%  | 1.9%  |
| 7   | 6.0%            | 16.8% | 6.3%  | 7.0%  | 4.4%  | 10.4% | 19.1% | 1.0%  |       | 7.0%  |       | 5.1%  | 5.6%  | 6.4%  | 6.2%  |
| 8   | 6.0%            | 1.4%  | 4.0%  | 5.2%  | 9.4%  | 7.4%  | 4.0%  | 26.8% | 9.4%  | 5.4%  | 0.4%  | 5.1%  | 0.4%  | 1.0%  | 0.6%  |
| 9   | 1.5%            | 5.5%  | 0.6%  | 6.7%  | 2.2%  | 8.9%  | 3.2%  | 16.6% | 30.2% | 3.7%  | 6.2%  | 1.7%  | 2.4%  | 4.4%  | 5.6%  |
| 10  | 12.1%           |       | 12.0% | 2.0%  | 21.5% |       | 5.1%  | 0.5%  | 0.7%  | 27.3% |       | 7.3%  |       |       | 11.8% |
| 11  |                 | 3.2%  | 0.6%  | 0.5%  |       |       | 2.2%  | 0.5%  | 1.3%  | 0.6%  | 59.8% |       | 12.0% | 9.4%  | 1.2%  |
| 12  | 3.0%            |       | 11.4% | 5.0%  | 7.7%  | 5.2%  | 6.1%  | 6.3%  | 9.4%  | 3.4%  | 0.7%  | 38.4% | 0.4%  | 9.4%  | 7.5%  |
| 13  |                 | 4.1%  | 0.6%  | 3.0%  |       | 8.1%  | 2.9%  | 1.7%  | 7.4%  | 0.8%  | 18.8% | 1.1%  | 38.2% | 4.9%  | 9.9%  |
| 14  | 0.5%            | 3.2%  | 2.9%  | 5.0%  | 3.9%  | 18.5% | 5.4%  | 6.1%  | 8.7%  | 1.7%  | 1.4%  | 7.9%  | 0.4%  | 36.0% | 13.7% |
| 15  |                 | 1.8%  | 2.9%  | 5.5%  | 4.4%  | 9.6%  | 5.8%  | 8.3%  | 8.1%  | 3.7%  | 2.5%  | 7.3%  | 8.4%  | 12.8% | 27.3% |
| PPV | 31.7%           | 42.7% | 14.9% | 16.0% | 27.6% | 6.7%  | 19.1% | 26.8% | 30.2% | 27.3% | 59.8% | 38.4% | 38.2% | 36.0% | 27.3% |
| FDR | 68.3%           | 57.3% | 85.1% | 84.0% | 72.4% | 93.3% | 80.9% | 73.2% | 69.8% | 72.7% | 40.2% | 61.6% | 61.8% | 64.0% | 72.7% |
|     | 1               | 2     | 3     | 4     | 5     | 6     | 7     | 8     | 9     | 10    | 11    | 12    | 13    | 14    | 15    |
|     | Predicted Class |       |       |       |       |       |       |       |       |       |       |       |       |       |       |

**Fig 14. Confusion matrix illustrating the worst-case classification performance of the LD (LD) classifier for Subject 5, using 40 time-domain features extracted with rectangular windowing.**

<https://doi.org/10.1371/journal.pone.0322580.g014>

capture the long-term effects of EMG decoding on motor function outcomes. Future studies should aim to address these limitations by recruiting larger samples and examining the long-term effects of EMG decoding. Additionally, future research should explore the potential benefits of combining EMG decoding with other rehabilitation strategies, such as physical therapy and occupational therapy.

## V. Conclusion

This study makes several key contributions to the field of EMG-based hand movement classification. We demonstrate the effectiveness of time-domain windowing techniques in preprocessing EMG signals and show that a L-SVM classifier can achieve high accuracy in classifying 15 distinct finger movements. The optimal combination of preprocessing technique, feature set, and classifier yielded a validation accuracy of 99.98%. These findings have significant implications for real-time classification of hand movements and provide a promising foundation for future research in this field, with potential applications in prosthetics, rehabilitation, and human-computer interaction. This study's results can inform the development of more accurate and reliable EMG-based systems for controlling prosthetic devices, exoskeletons, and other assistive technologies. Future studies should aim to translate the findings of this study into clinical practice, exploring the potential of EMG decoding as a therapeutic tool for individuals with neurological disorders. Additionally, The significance of this study lies in its potential to contribute to the development of novel rehabilitation strategies for individuals with neurological disorders. The study's findings will provide valuable insights into the efficacy of EMG decoding in improving motor function outcomes, and will inform the development of future rehabilitation strategies.

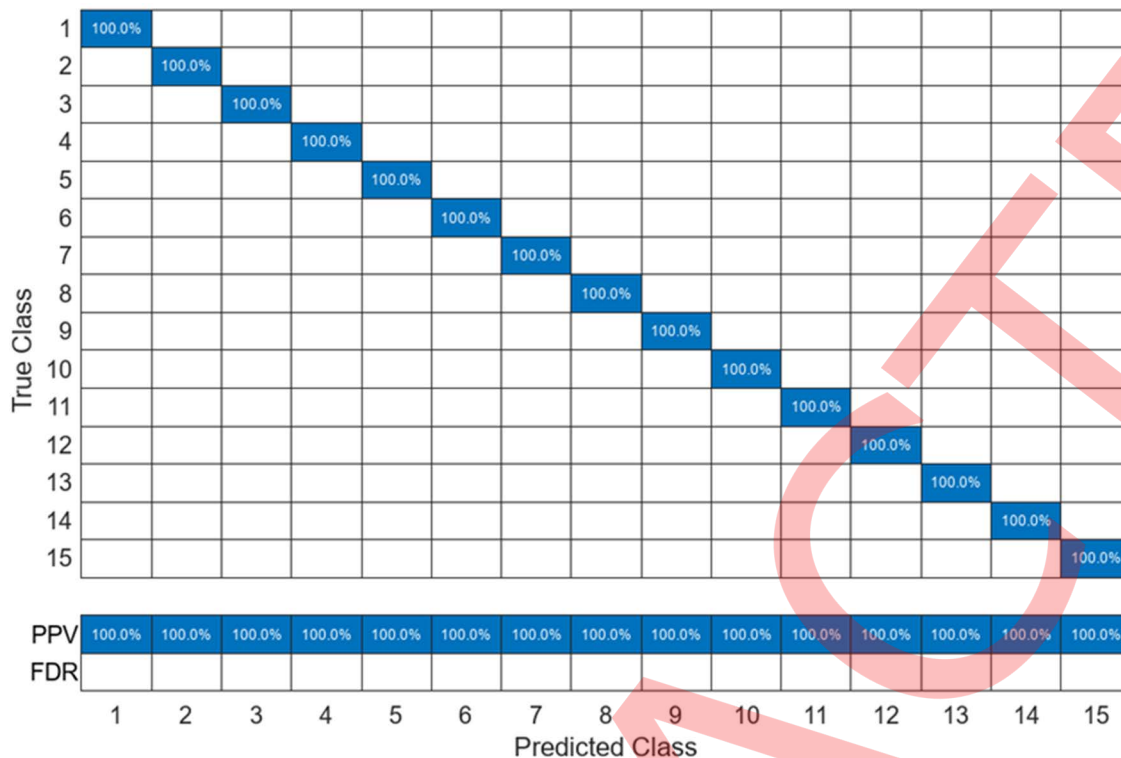

Fig 15. Confusion matrix illustrating the optimal classification performance of the Support Vector Machine (SVM) classifier for Subject 5, using 40 time-domain features extracted with rectangular windowing.

<https://doi.org/10.1371/journal.pone.0322580.g015>

Table 8. Classification performance metrics of machine learning models using 6 frequency-domain features extracted with rectangular window preprocessing.

| Classifier | Recall | Specificity | Precision | F1 Score | Matthews Correlation Coefficient | Kappa  |
|------------|--------|-------------|-----------|----------|----------------------------------|--------|
| LD         | 0.3861 | 0.9563      | 0.3983    | 0.3762   | 0.3435                           | 0.7885 |
| L-SVM      | 0.6041 | 0.9719      | 0.6080    | 0.6027   | 0.5771                           | 0.6397 |
| W-KNN      | 0.7206 | 0.9806      | 0.7253    | 0.7179   | 0.7029                           | 0.4525 |
| C-Tree     | 0.3184 | 0.9513      | 0.2546    | 0.2468   | 0.2367                           | 0.8167 |
| LR         | 0.4652 | 0.9618      | 0.4643    | 0.4588   | 0.4244                           | 0.7402 |
| BNN        | 0.7563 | 0.9826      | 0.7556    | 0.7554   | 0.7383                           | 0.4412 |
| TNN        | 0.7292 | 0.9807      | 0.7285    | 0.7283   | 0.7093                           | 0.5008 |

<https://doi.org/10.1371/journal.pone.0322580.t008>

Table 9. Comparative performance evaluation of classifiers using 40 time-domain features with rectangular window preprocessing technique.

| Classifier | Recall | Specificity | Precision | F1 Score | Matthews Correlation Coefficient | Kappa  |
|------------|--------|-------------|-----------|----------|----------------------------------|--------|
| LD         | 0.4946 | 0.9639      | 0.5135    | 0.4880   | 0.4616                           | 0.7419 |
| L-SVM      | 0.9998 | 1           | 0.9998    | 0.9998   | 0.9998                           | 0.9985 |
| W-KNN      | 0.9830 | 0.9988      | 0.9832    | 0.9830   | 0.9819                           | 0.8636 |
| C-Tree     | 0.5290 | 0.9663      | 0.8572    | 0.6008   | 0.6222                           | 0.7360 |
| LR         | 0.6074 | 0.9720      | 0.6219    | 0.6068   | 0.5837                           | 0.6711 |
| BNN        | 0.9934 | 0.9995      | 0.9934    | 0.9934   | 0.9929                           | 0.9468 |
| TNN        | 0.9923 | 0.9994      | 0.9923    | 0.9923   | 0.9917                           | 0.9378 |

<https://doi.org/10.1371/journal.pone.0322580.t009>

## Supporting information

**S1 File. Supplementary figures.** a. Fig 1: Experimental protocol of individual and combined 15 finger movements. b. Fig 2: Complete recording setup.

(RAR)

**S2 File. Supplementary materials and methods, classifiers description.** a. Supplementary information about materials and methods, including classifiers structure with description of all the classifiers utilized.

(RAR)

**S3 File. Supplementary materials and methods, time domain windowing description.** a. Supplementary information about segmentation techniques including all time domain windowing techniques.

(RAR)

## Acknowledgments

The Authors would like to thank Ms. Nida Shabbir and Ms. Nazli Khurram for assistance in the data collection. Especial thanks to Dr. Asim Waris (Head of Department of Biomedical Engineering & Sciences, SMME NUST H-12 Islamabad) for providing lab facility for EMG data recording.

## Author contributions

**Conceptualization:** Asim Waris, Ikramullah Khosa.

**Data curation:** Asim Waris, Muhammad Faisal, Ikramullah Khosa, Syed Omer Gilani, Muhammad Jawad Khan.

**Formal analysis:** Muhammad Faisal, Ikramullah Khosa, Muhammad Jawad Khan, Fawwaz Hazzazi.

**Investigation:** Asim Waris, Muhammad Faisal, Ikramullah Khosa.

**Methodology:** Asim Waris, Muhammad Faisal, Ikramullah Khosa, Muhammad Jawad Khan.

**Project administration:** Syed Omer Gilani.

**Software:** Asim Waris, Muhammad Faisal, Ikramullah Khosa, Muhammad Jawad Khan, Fawwaz Hazzazi.

**Validation:** Muhammad Faisal, Syed Omer Gilani.

**Visualization:** Muhammad Faisal, Syed Omer Gilani.

**Writing – original draft:** Muhammad Faisal.

**Writing – review & editing:** Asim Waris, Ikramullah Khosa, Syed Omer Gilani, Muhammad Jawad Khan, Fawwaz Hazzazi, Muhammad Adeel Ijaz.

## References

1. Al Mudawi N, Ansar H, Alazeb A, et al. Innovative healthcare solutions: robust hand gesture recognition of daily life routines using 1D CNN. *Front Bioeng Biotechnol.* 2024;12:1401803.
2. Chen Y, et al. Upper limb movement recognition using wearable sensors and machine learning. *IEEE Trans Neural Syst Rehabil Eng.* 2018;26(5):1435-1444.
3. Elashmawi WH, Ayman A, Antoun M, et al. A comprehensive review on Brain Computer Interface (BCI) based machine and deep learning algorithms for stroke rehabilitation. *Appl Sci.* 2024;14(12):6347.
4. Shi L, Wang R, Zhao J, et al. Detection of rehabilitation training effect of upper limb movement disorder based on MPL-CNN. *Sensors.* 2024;24(3):1105.
5. Imran U, Waris A, Gilani SO, Iqbal J, Jamil M, Eldesoky GE, et al. Patient-specific movement regime: investigating the potential of upper-extremity motions for intelligent myoelectric prosthetic control. *IEEE Access.* 2024;12:35663–82. <https://doi.org/10.1109/access.2024.3365639>

6. Segura D, Romero E, Abarca VE, Elias DA. Upper limb prostheses by the level of amputation: a systematic review. *Prosthesis*. 2024;6(2):277–300. <https://doi.org/10.3390/prosthesis6020022>
7. Huang HH, Hargrove LJ, Ortiz-Catalan M, Sensinger JW. Integrating upper-limb prostheses with the human body: technology advances, readiness, and roles in human-prosthesis interaction. *Annu Rev Biomed Eng*. 2024;26(1):503–28. <https://doi.org/10.1146/annurev-bioeng-110222-095816> PMID: [38594922](https://pubmed.ncbi.nlm.nih.gov/38594922/)
8. Wang S, Liu J, Chen S, Wang S, Peng Y, Liao C, et al. Recognizing wearable upper-limb rehabilitation gestures by a hybrid multi-feature neural network. *Eng Appl Artif Intell*. 2024;127:107424. <https://doi.org/10.1016/j.engappai.2023.107424>
9. Nunes AS, Yildiz Potter İ, Mishra RK, Bonato P, Vaziri A. A deep learning wearable-based solution for continuous at-home monitoring of upper limb goal-directed movements. *Front Neurol*. 2024;14:1295132. <https://doi.org/10.3389/fneur.2023.1295132> PMID: [38249724](https://pubmed.ncbi.nlm.nih.gov/38249724/)
10. Mekruksavanich S, Jitpattanakul A. Device position-independent human activity recognition with wearable sensors using deep neural networks. *Appl Sci*. 2024;14(5):2107. <https://doi.org/10.3390/app14052107>
11. Kok CL, Ho CK, Tan FK, Koh YY. Machine learning-based feature extraction and classification of EMG signals for intuitive prosthetic control. *Appl Sci*. 2024;14(13):5784. <https://doi.org/10.3390/app14135784>
12. Alzahrani A, Ullah A. Advanced biomechanical analytics: Wearable technologies for precision health monitoring in sports performance. *Digit Health*. 2024;10:20552076241256745. <https://doi.org/10.1177/20552076241256745> PMID: [38840658](https://pubmed.ncbi.nlm.nih.gov/38840658/)
13. Lu Y, Wang J, Ren Y, Ren J. Effects of fatigue on ankle flexor activity and ground reaction forces in elite table tennis players. *Sensors (Basel)*. 2024;24(20):6521. <https://doi.org/10.3390/s24206521> PMID: [39460001](https://pubmed.ncbi.nlm.nih.gov/39460001/)
14. Rissanen S, Kankaanpää M, Tarvainen MP, Nuutinen J, Tarkka IM, Airaksinen O, et al. Analysis of surface EMG signal morphology in Parkinson's disease. *Physiol Meas*. 2007;28(12):1507–18. <https://doi.org/10.1088/0967-3334/28/12/007> PMID: [18057517](https://pubmed.ncbi.nlm.nih.gov/18057517/)
15. Nizamis K, Rijken NHM, van Middelaar R, Neto J, Koopman BFJM, Sartori M. Characterization of forearm muscle activation in Duchenne muscular dystrophy via high-density electromyography: a case study on the implications for myoelectric control. *Front Neurol*. 2020;11. <https://doi.org/10.3389/fneur.2020.00231>
16. Sobierajska-Rek A, Wojnicz W, Zagrodny B, Ludwicki M, Pytka K, Jabłońska-Brudło J. Biomechanical analysis of the upper limb of patients with Duchenne muscular dystrophy in chosen functional tasks: a multi-case study. *SSRN 5043204*. n.d.
17. Kumar N, Singh AK, Gupta V, et al. Detection and characterization of antibiotic resistance genes in wastewater treatment plants. *PLOS ONE*. 2022;17(10):e0272479. <https://doi.org/10.1371/journal.pone.0272479>
18. Yan H, Li X, Shi Z, Wang S. Upper limb movement prediction based on segmented sEMG signals. *IEEE Access*. 2024;12:119589–601. <https://doi.org/10.1109/access.2024.3447275>
19. Waris A, Niazi IK, Jamil M, Englehart K, Jensen W, Kamavuako EN. Multiday evaluation of techniques for EMG-based classification of hand motions. *IEEE J Biomed Health Inform*. 2019;23(4):1526–34. <https://doi.org/10.1109/JBHI.2018.2864335> PMID: [30106701](https://pubmed.ncbi.nlm.nih.gov/30106701/)
20. Nayab M, Waris A, Imran U, Shafique U. Improving myoelectric control performance through optimal EMG signal feature selection. In *Proceedings of the 2023 3rd International Conference on Digital Futures and Transformative Technologies (ICoDT2)*; 2023. p. 1–5. <https://doi.org/10.1109/icodt259378.2023.10325706>
21. Jochumsen M, Niazi IK, Zia Ur Rehman M, Amjad I, Shafique M, Gilani SO, et al. Decoding attempted hand movements in stroke patients using surface electromyography. *Sensors (Basel)*. 2020;20(23):6763. <https://doi.org/10.3390/s20236763> PMID: [33256073](https://pubmed.ncbi.nlm.nih.gov/33256073/)
22. Zia Ur Rehman M, Waris A, Gilani SO, Jochumsen M, Niazi IK, Jamil M, et al. Multiday EMG-based classification of hand motions with deep learning techniques. *Sensors (Basel)*. 2018;18(8):2497. <https://doi.org/10.3390/s18082497> PMID: [30071617](https://pubmed.ncbi.nlm.nih.gov/30071617/)
23. Meyers EC, Gabrieli D, Tacca N, Wengerd L, Darrow M, Schlink BR, et al. Decoding hand and wrist movement intention from chronic stroke survivors with hemiparesis using a user-friendly, wearable EMG-based neural interface. *J Neuroeng Rehabil*. 2024;21(1):7. <https://doi.org/10.1186/s12984-023-01301-w> PMID: [38218901](https://pubmed.ncbi.nlm.nih.gov/38218901/)
24. Wang X, Liao F, Zhang W, Yao F, Li J. Upper limb motion intention recognition based on sEMG and EMD-LSSVM. *J Phys: Conf Ser*. 2024;2872(1):012051. <https://doi.org/10.1088/1742-6596/2872/1/012051>
25. Wang X, Wang J, Fei N, Duanmu D, Feng B, Li X, et al. Alternative muscle synergy patterns of upper limb amputees. *Cogn Neurodyn*. 2024;18(3):1119–33. <https://doi.org/10.1007/s11571-023-09969-5> PMID: [38826662](https://pubmed.ncbi.nlm.nih.gov/38826662/)
26. Tuncer T, Dogan S, Subasi A. Novel finger movement classification method based on multi-centered binary pattern using surface electromyogram signals. *Biomed Signal Process Control*. 2022;71:103153. <https://doi.org/10.1016/j.bspc.2021.103153>
27. Yaqoob A, Mir MA, Jagannadha Rao GVV, Tejani GG. Transforming cancer classification: the role of advanced gene selection. *Diagnostics (Basel)*. 2024;14(23):2632. <https://doi.org/10.3390/diagnostics14232632> PMID: [39682540](https://pubmed.ncbi.nlm.nih.gov/39682540/)
28. Arslan MT, Yildirim E. Classification of intensive-less intensive and related-unrelated taskstasks. *IJCESEN*. 2024;10(2). <https://doi.org/10.22399/ijcesen.328>
29. Sultana A, Opu MTI, Ahmed F, Alam MS. A novel machine learning algorithm for finger movement classification from surface electromyogram signals using welch power estimation. *Healthcare Anal*. 2024;5:100296. <https://doi.org/10.1016/j.health.2023.100296>
30. Pant A, Kumar A. Hanning FIR window filtering analysis for EEG signals. *Biomedical Anal*. 2024;1(2):111–23. <https://doi.org/10.1016/j.bioana.2024.05.003>

31. Pant A, Kumar A, Verma C, Illés Z. Comparative exploration on EEG signal filtering using window control methods. *Results Control Optim.* 2024;17:100485. <https://doi.org/10.1016/j.rico.2024.100485>
32. Ikizler N, Ekim G, Atasoy A. A novel approach on converting eye blink signals in EEG to speech with cross correlation technique. *Adv Electr Comp Eng.* 2023;23(2):29–38. <https://doi.org/10.4316/aece.2023.02004>
33. Wang S. SVM-based support vector type recognition machine for smart things in Soccer Training Motion Recognition. *SCPE.* 2024;25(4):2519–31. <https://doi.org/10.12694/scpe.v25i4.2923>
34. T. P, Elumalai VK, E. B. Hand gesture classification framework leveraging the entropy features from sEMG signals and VMD augmented multi-class SVM. *Expert Syst Appl.* 2024;238:121972. <https://doi.org/10.1016/j.eswa.2023.121972>
35. Junling Y. Online learning system for English speech automatic recognition based on hidden Markov model algorithm and conditional random field algorithm. *Entertain Comput.* 2024;51:100729. <https://doi.org/10.1016/j.entcom.2024.100729>
36. Wu J, Hu H, Song Y, Lyu D, Li X. Ultrasonic phased array phase shift migration imaging of irregular surface components using attenuation compensation and anti-aliasing technique. *NDT E Int.* 2023;133:102759. <https://doi.org/10.1016/j.ndteint.2022.102759>
37. Wahid A, Ullah K, Irfan Ullah S, Amin M, Almutairi S, Abohashrh M. sEMG-based upper limb elbow force estimation using CNN, CNN-LSTM, and CNN-GRU Models. *IEEE Access.* 2024;12:128979–91. <https://doi.org/10.1109/access.2024.3451209>
38. Shimizu Y, Mori T, Yoshikawa K, Katane D, Torishima H, Hara Y, et al. Developing a novel prosthetic hand with wireless wearable sensor technology based on user perspectives: a pilot study. *Sensors (Basel).* 2024;24(9):2765. <https://doi.org/10.3390/s24092765> PMID: 38732871
39. Kansal S, Garg D, Upadhyay A, Mittal S, Talwar GS. DL-AMPUT-EEG: design and development of the low-cost prosthesis for rehabilitation of upper limb amputees using deep-learning-based techniques. *Eng Appl Artif Intell.* 2023;126:106990. <https://doi.org/10.1016/j.engappai.2023.106990>
40. Jiang S, Kang P, Song X, Lo B, Shull P. Emerging wearable interfaces and algorithms for hand gesture recognition: a survey. *IEEE Rev Biomed Eng.* 2022;15:85–102. <https://doi.org/10.1109/RBME.2021.3078190> PMID: 33961564
41. Nasri N, Orts-Escolano S, Cazorla M. An sEMG-controlled 3D game for rehabilitation therapies: real-time time hand gesture recognition using deep learning techniques. *Sensors (Basel).* 2020;20(22):6451. <https://doi.org/10.3390/s20226451> PMID: 33198083
42. Šumak B, Brdnik S, Pušnik M. Sensors and artificial intelligence methods and algorithms for human-computer intelligent interaction: a systematic mapping study. *Sensors (Basel).* 2021;22(1):20. <https://doi.org/10.3390/s22010020> PMID: 35009562
43. Miao S, Shen C, Feng X, Zhu Q, Shorfuzzaman M, Lv Z. Upper limb rehabilitation system for stroke survivors based on multi-modal sensors and machine learning. *IEEE Access.* 2021;9:30283–91. <https://doi.org/10.1109/access.2021.3055960>
44. Boukhenoufa I, Zhai X, Utti V, Jackson J, McDonald-Maier KD. Wearable sensors and machine learning in post-stroke rehabilitation assessment: a systematic review. *Biomed Signal Proces Control.* 2022;71:103197. <https://doi.org/10.1016/j.bspc.2021.103197>
